# Supplementary material for: Manipulating the spin crossover behaviour in a series of cyanide-bridged {FeIII2FeII2} molecular squares through NCE− co-ligands
Source: Royal Society of Chemistry journal article supplement (doi:10.1039/d2dt00058j), 2022-01-01
Supplement: d2dt00058j1.pdf [file d2dt00058j1.pdf]

## Electronic Supplementary Information (ESI)

### **Manipulating the spin crossover behaviour in a series of cyanide-bridged {Fe<sup>III</sup><sub>2</sub>Fe<sup>II</sup><sub>2</sub>} molecular squares through NCE<sup>-</sup> co-ligands**

Maolin You,<sup>a,b</sup> Giang T. Nguyen,<sup>b</sup> Dong Shao,<sup>a</sup> Te Wang,<sup>a</sup> Xiao-Yong Chang,<sup>a</sup> Liviu Ungur,<sup>\*b</sup> and Yuan-Zhu Zhang<sup>\*a</sup>

<sup>a</sup> Department of Chemistry, Southern University of Science and Technology (SUSTech), Shenzhen, 518055, China.

<sup>b</sup> Department of Chemistry, National University of Singapore, Science Drive 3, Singapore, 117543 (Singapore).

Email: [zhangyz@sustech.edu.cn](mailto:zhangyz@sustech.edu.cn); [chmlu@nus.edu.sg](mailto:chmlu@nus.edu.sg)

**Table S1.** Selected bond angles (degree) around metal centers for **1**, **2** and **3**.

|            | <b>Bond Angles (degree)</b> |                           |                           |                           |                           |                           |
|------------|-----------------------------|---------------------------|---------------------------|---------------------------|---------------------------|---------------------------|
|            | <b>1</b> <sup>100 K</sup>   | <b>1</b> <sup>300 K</sup> | <b>2</b> <sup>100 K</sup> | <b>2</b> <sup>300 K</sup> | <b>3</b> <sup>100 K</sup> | <b>3</b> <sup>300 K</sup> |
| C1-Fe1-C2  | 88.50(11)                   | 88.32(18)                 | 87.9(6)                   | 87.1(4)                   | 88.11(11)                 | 88.0(3)                   |
| C1-Fe1-C3  | 86.74(12)                   | 88.1(2)                   | 84.2(7)                   | 85.4(6)                   | 87.86(13)                 | 85.4(5)                   |
| C1-Fe1-N8  | 176.90(11)                  | 179.7(2)                  | 174.7(6)                  | 175.2(5)                  | 179.19(11)                | 175.1(4)                  |
| C1-Fe1-N9  | 90.49(10)                   | 90.30(17)                 | 90.9(5)                   | 92.5(4)                   | 90.72(11)                 | 91.4(3)                   |
| C1-Fe1-N10 | 92.62(11)                   | 90.62(18)                 | 95.0(7)                   | 94.0(5)                   | 91.55(12)                 | 94.1(5)                   |
| C2-Fe1-C3  | 87.69(12)                   | 85.0(2)                   | 87.4(7)                   | 88.1(5)                   | 85.27(13)                 | 87.0(5)                   |
| C2-Fe1-N8  | 90.96(10)                   | 91.55(17)                 | 91.2(6)                   | 90.7(4)                   | 91.16(11)                 | 90.6(3)                   |
| C2-Fe1-N9  | 178.10(11)                  | 175.5(2)                  | 178.8(6)                  | 179.2(5)                  | 175.86(12)                | 178.9(5)                  |
| C2-Fe1-N10 | 92.40(11)                   | 93.51(19)                 | 91.3(6)                   | 91.2(5)                   | 94.03(12)                 | 92.1(4)                   |
| C3-Fe1-N8  | 90.19(11)                   | 92.2(2)                   | 90.5(6)                   | 90.3(5)                   | 91.72(12)                 | 89.8(5)                   |
| C3-Fe1-N9  | 90.65(11)                   | 90.7(2)                   | 92.1(6)                   | 91.2(5)                   | 90.72(12)                 | 92.0(4)                   |
| C3-Fe1-N10 | 179.35(12)                  | 178.0(2)                  | 178.5(8)                  | 179.0(6)                  | 179.10(15)                | 178.9(5)                  |
| N8-Fe1-N9  | 89.96(9)                    | 89.85(16)                 | 90.0(5)                   | 89.6(3)                   | 89.98(10)                 | 89.9(3)                   |
| N8-Fe1-N10 | 90.45(10)                   | 89.12(18)                 | 90.3(6)                   | 90.3(5)                   | 88.87(11)                 | 90.6(4)                   |
| N9-Fe1-N10 | 89.26(10)                   | 90.8(2)                   | 89.2(6)                   | 89.6(4)                   | 89.97(11)                 | 89.0(4)                   |
| N1-Fe2-N2  | 89.06(9)                    | 92.67(15)                 | 89.3(5)                   | 92.9(3)                   | 89.19(10)                 | 91.9(3)                   |
| N1-Fe2-N4  | 178.31(10)                  | 173.67(18)                | 178.8(5)                  | 172.6(4)                  | 178.56(11)                | 174.2(3)                  |
| N1-Fe2-N5  | 88.78(9)                    | 91.34(15)                 | 89.4(5)                   | 90.7(4)                   | 89.91(10)                 | 89.8(3)                   |
| N1-Fe2-N6  | 87.76(10)                   | 87.74(17)                 | 89.2(6)                   | 88.7(4)                   | 88.19(11)                 | 88.1(3)                   |
| N1-Fe2-N7  | 90.60(10)                   | 93.78(19)                 | 88.8(6)                   | 92.5(4)                   | 89.68(11)                 | 91.1(4)                   |
| N2-Fe2-N4  | 89.75(9)                    | 90.05(15)                 | 89.6(5)                   | 91.6(3)                   | 89.50(10)                 | 91.0(3)                   |
| N2-Fe2-N5  | 177.84(9)                   | 171.70(16)                | 178.7(6)                  | 173.9(4)                  | 178.95(11)                | 176.7(4)                  |
| N2-Fe2-N6  | 88.27(10)                   | 88.58(16)                 | 87.4(6)                   | 87.9(4)                   | 89.36(11)                 | 88.5(3)                   |
| N2-Fe2-N7  | 90.36(10)                   | 92.86(19)                 | 90.2(6)                   | 93.4(4)                   | 88.75(11)                 | 92.3(3)                   |
| N4-Fe2-N5  | 92.41(9)                    | 85.25(16)                 | 91.8(5)                   | 84.2(4)                   | 91.40(10)                 | 87.1(3)                   |
| N4-Fe2-N6  | 90.99(10)                   | 86.63(16)                 | 90.4(6)                   | 85.6(4)                   | 92.39(11)                 | 87.0(3)                   |
| N4-Fe2-N7  | 90.62(10)                   | 91.78(18)                 | 91.5(6)                   | 93.1(4)                   | 89.70(12)                 | 93.7(3)                   |
| N5-Fe2-N6  | 91.66(10)                   | 84.33(16)                 | 92.4(6)                   | 87.3(4)                   | 91.16(11)                 | 88.7(4)                   |
| N5-Fe2-N7  | 89.65(10)                   | 94.11(19)                 | 89.9(6)                   | 91.3(4)                   | 90.71(12)                 | 90.5(4)                   |
| N6-Fe2-N7  | 177.88(10)                  | 177.9(2)                  | 176.9(6)                  | 178.1(4)                  | 177.17(11)                | 178.9(3)                  |

**Table S2.** Selected bond lengths around metal centers for **1**, **2** and **3**.

|         | <b>Bond Lengths (Å)</b>   |                           |                           |                           |                           |                           |
|---------|---------------------------|---------------------------|---------------------------|---------------------------|---------------------------|---------------------------|
|         | <b>1</b> <sup>100 K</sup> | <b>1</b> <sup>300 K</sup> | <b>2</b> <sup>100 K</sup> | <b>2</b> <sup>300 K</sup> | <b>3</b> <sup>100 K</sup> | <b>3</b> <sup>300 K</sup> |
| Fe1-C1  | 1.923(3)                  | 1.917(4)                  | 1.927(18)                 | 1.912(11)                 | 1.923(3)                  | 1.914(10)                 |
| Fe1-C2  | 1.922(3)                  | 1.930(4)                  | 1.905(16)                 | 1.889(11)                 | 1.931(3)                  | 1.923(9)                  |
| Fe1-C3  | 1.947(3)                  | 1.937(6)                  | 1.97(2)                   | 1.936(16)                 | 1.932(4)                  | 1.923(15)                 |
| Fe1-N8  | 2.007(2)                  | 2.016(4)                  | 1.990(14)                 | 2.000(10)                 | 2.010(2)                  | 1.996(8)                  |
| Fe1-N9  | 2.009(2)                  | 2.008(4)                  | 2.012(13)                 | 1.999(8)                  | 1.996(3)                  | 2.008(7)                  |
| Fe1-N10 | 1.985(2)                  | 2.001(5)                  | 1.968(15)                 | 1.977(12)                 | 1.998(3)                  | 1.977(11)                 |
| Fe2-N1  | 1.947(2)                  | 2.104(4)                  | 1.926(14)                 | 2.088(10)                 | 1.938(2)                  | 2.030(8)                  |
| Fe2-N2  | 1.942(2)                  | 2.117(4)                  | 1.904(13)                 | 2.079(9)                  | 1.948(2)                  | 2.034(7)                  |
| Fe2-N4  | 2.005(2)                  | 2.211(4)                  | 2.004(14)                 | 2.221(10)                 | 1.997(2)                  | 2.130(6)                  |
| Fe2-N5  | 2.001(2)                  | 2.249(4)                  | 1.977(12)                 | 2.183(10)                 | 2.009(2)                  | 2.123(8)                  |
| Fe2-N6  | 2.018(2)                  | 2.259(5)                  | 2.033(14)                 | 2.219(11)                 | 2.008(3)                  | 2.110(10)                 |
| Fe2-N7  | 1.945(3)                  | 2.071(5)                  | 1.887(17)                 | 2.099(14)                 | 1.958(3)                  | 2.034(13)                 |

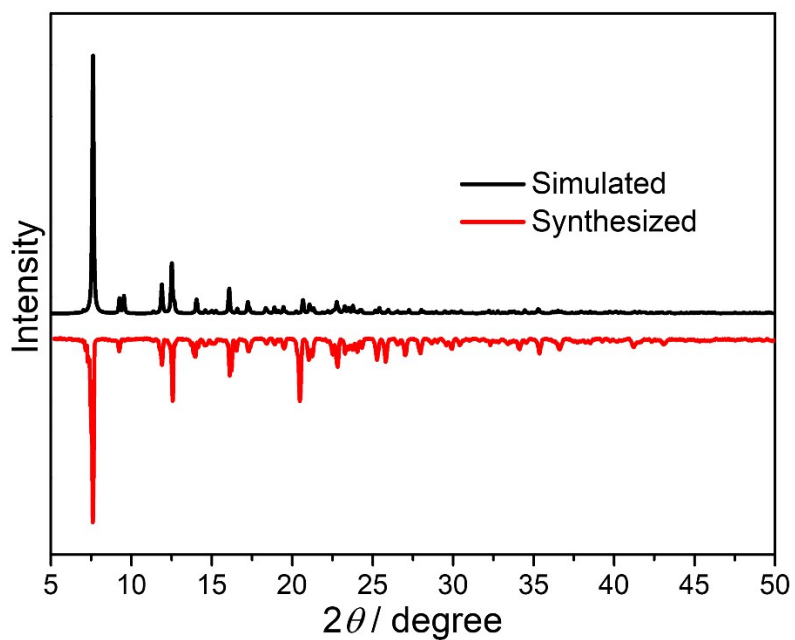

**Fig.S1** X-ray powder diffraction diagrams of **1** (red) and the simulated spectra from single crystal data at 300 K (black).

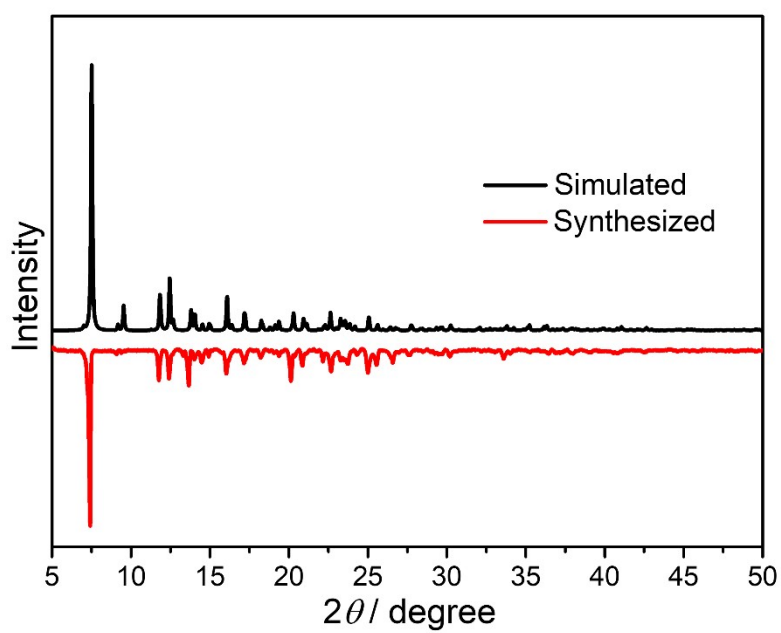

**Fig.S2** X-ray powder diffraction diagrams of **2** (red) and the simulated spectra from single crystal data at 300 K (black).

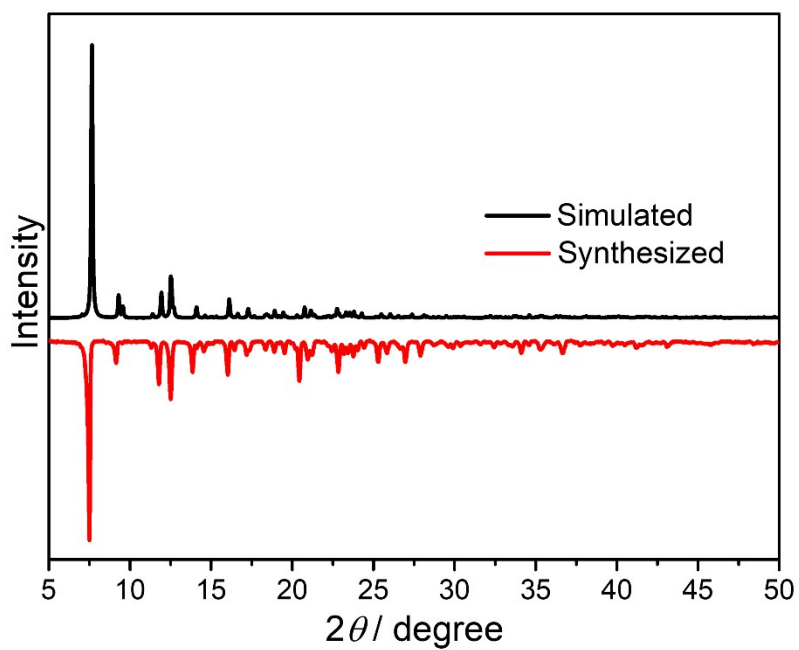

**Fig.S3** X-ray powder diffraction diagrams of **3** (red) and the simulated spectra from single crystal data at 300 K (black)

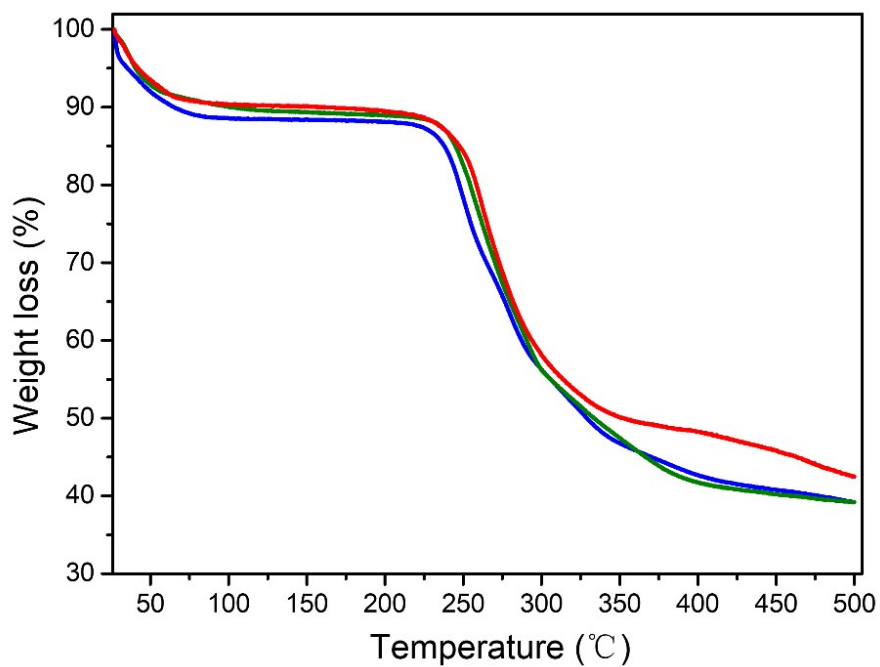

**Fig.S4** Thermogravimetric (TGA) plot of **1** (blue), **2** (olive) and **3** (red) at a rate of 3 K/min under an argon atmosphere.

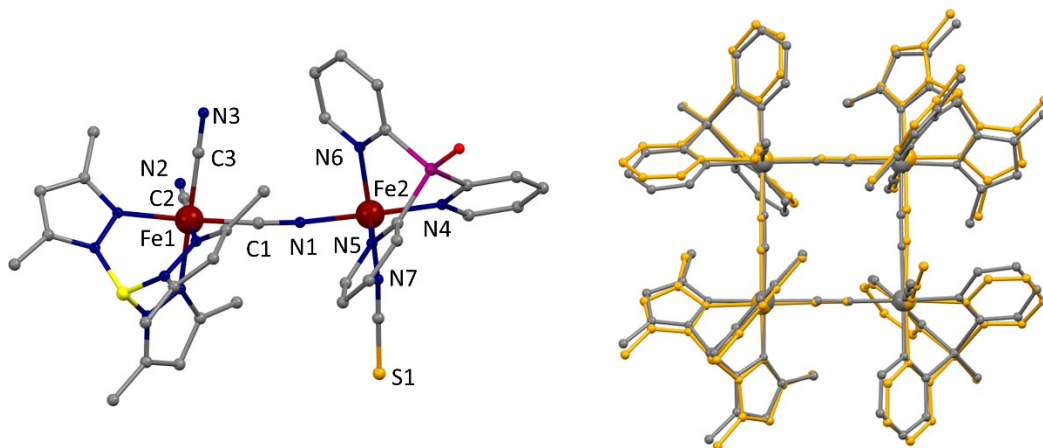

**Fig.S5** (Left) The asymmetric unit of **1** at 100 K and (Right) overlapped X-ray crystal structures for **1** at 100 K (gray) and 300 K (orange), Hydrogen atoms and solvents are omitted for clarity.

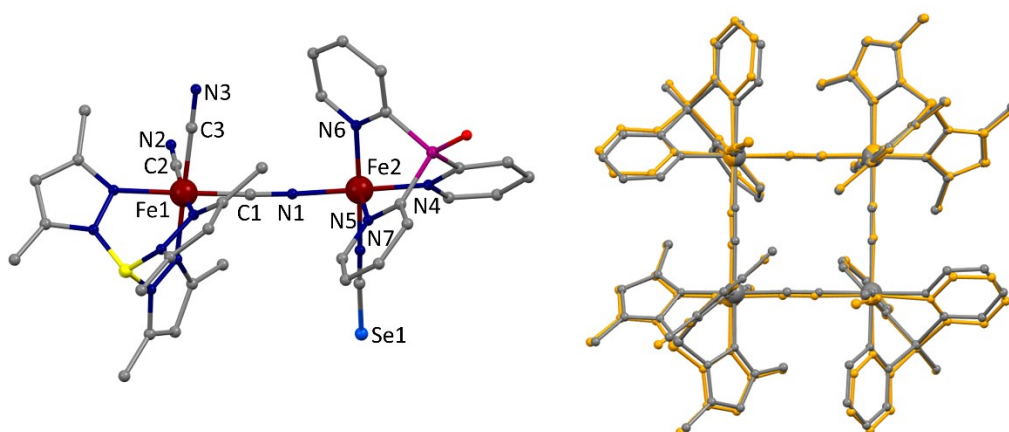

**Fig.S6** (Left) The asymmetric unit of **2** at 100 K and (Right) overlapped X-ray crystal structures for **2** at 100 K (gray) and 300 K (orange), Hydrogen atoms and solvents are omitted for clarity.

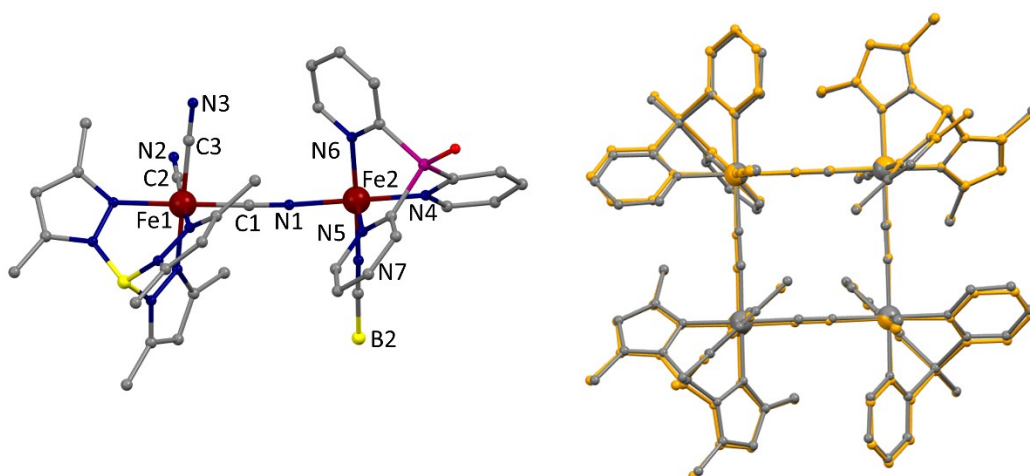

**Fig.S7** (Left) The asymmetric unit of **3** at 100 K and (Right) overlapped X-ray crystal structures for **3** at 100 K (gray) and 300 K (orange), Hydrogen atoms and solvents are omitted for clarity.

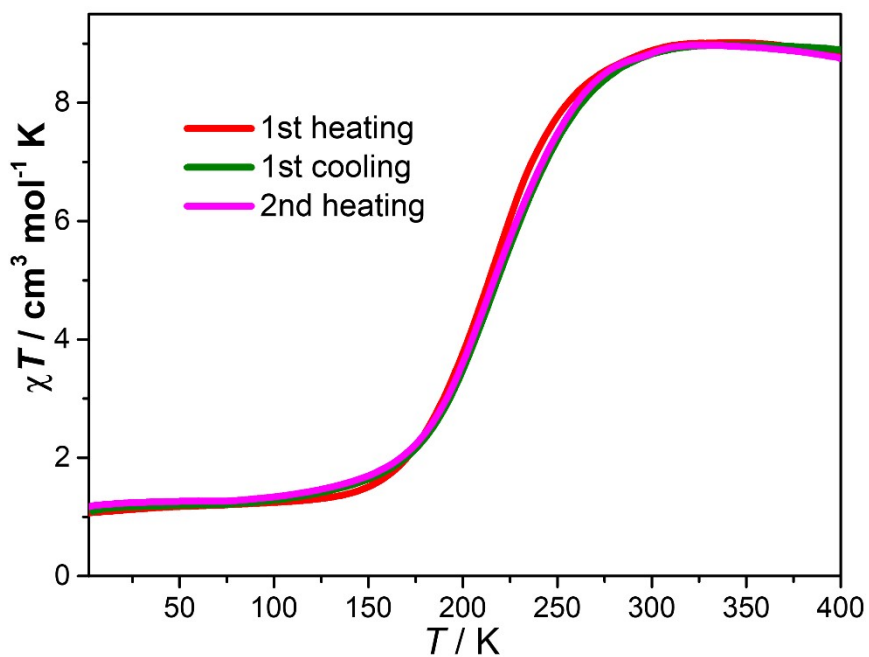

**Fig.S8** Variable-temperature susceptibilities of **1** and its desovated phase in the cooling and heating cycle (scan rate: 2 K min<sup>-1</sup>).

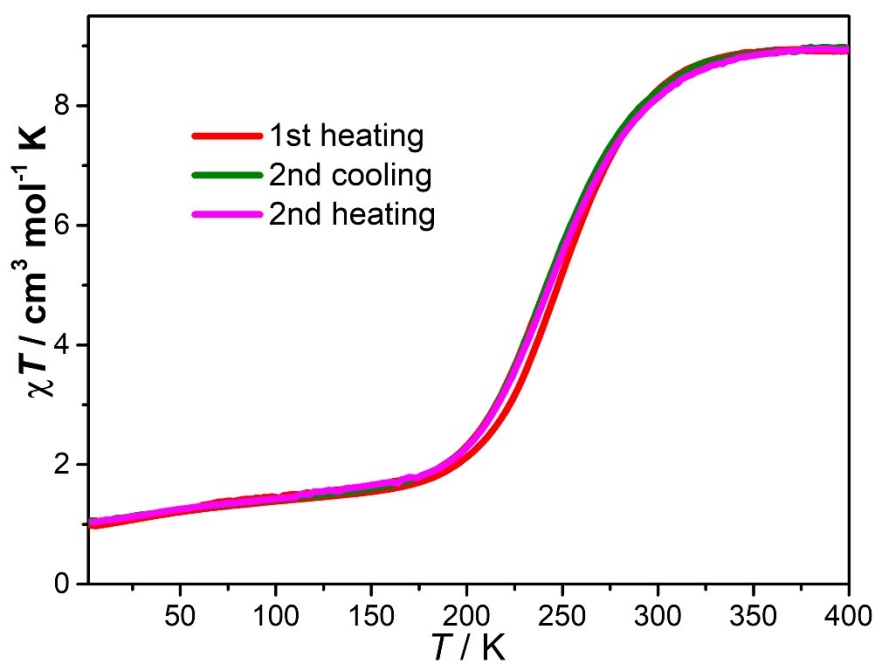

**Fig.S9** Variable-temperature susceptibilities of **2** and its desovated phase in the cooling and heating cycle (scan rate: 2 K min<sup>-1</sup>).

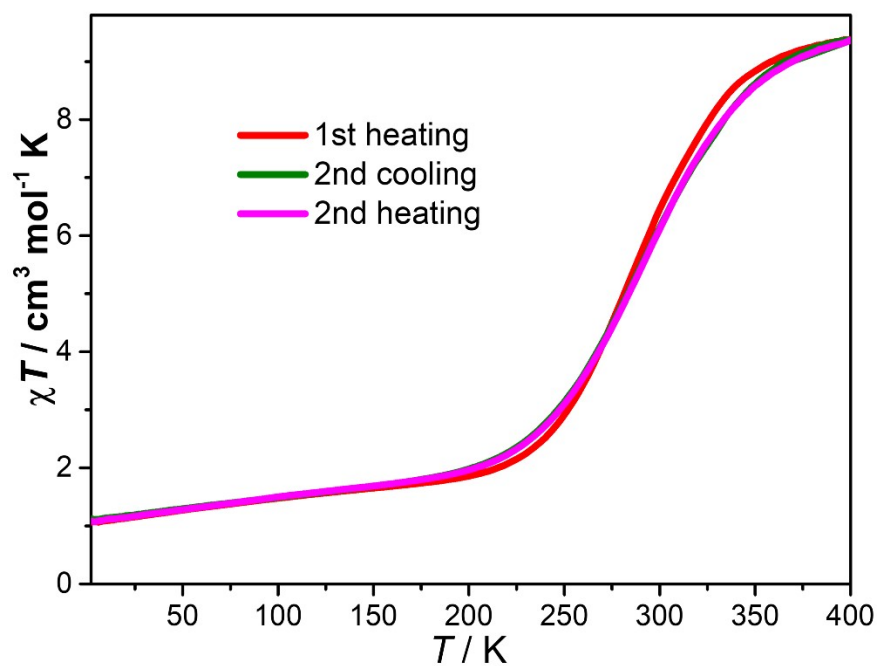

**Fig.S10** Variable-temperature susceptibilities of **3** and its desovated phase in the cooling and heating cycle (scan rate: 2 K min<sup>-1</sup>).

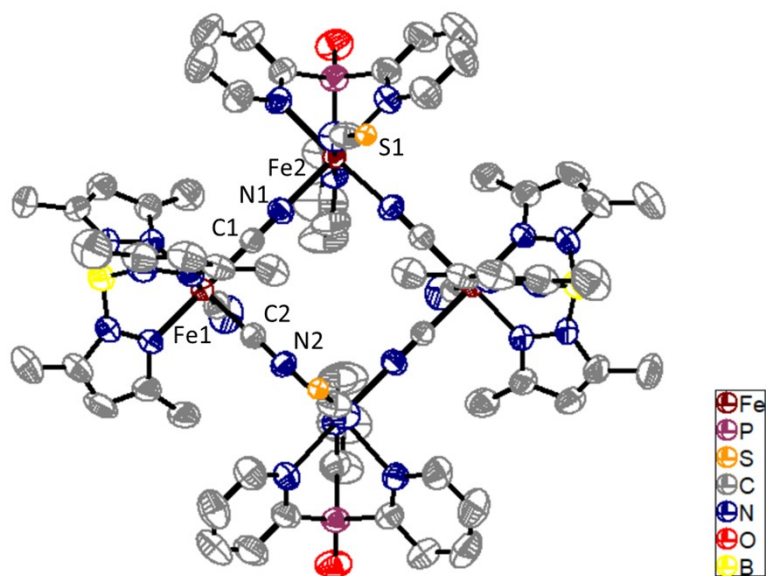

**Fig.S11** Crystal structure of **1** at 300 K drawn with ellipsoids at the 50% probability level. The hydrogen atoms have been omitted for the sake of clarity.



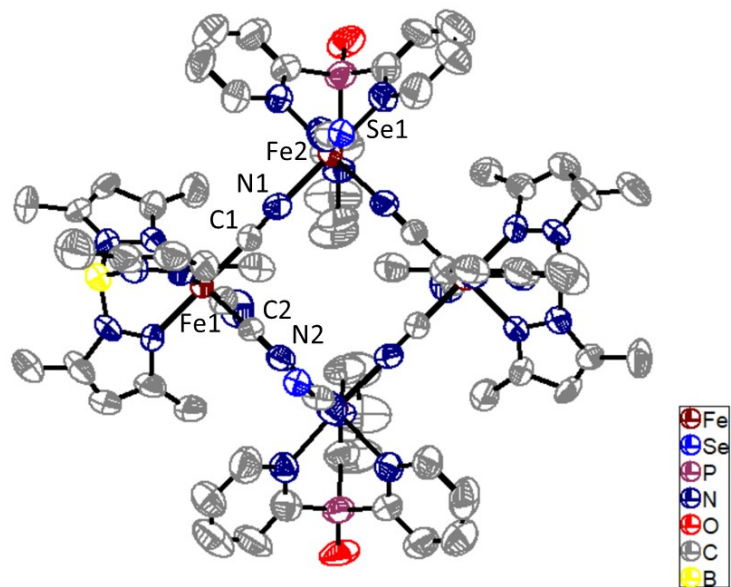

**Fig.S12** Crystal structure of **2** at 300 K drawn with ellipsoids at the 50% probability level. The hydrogen atoms have been omitted for the sake of clarity.

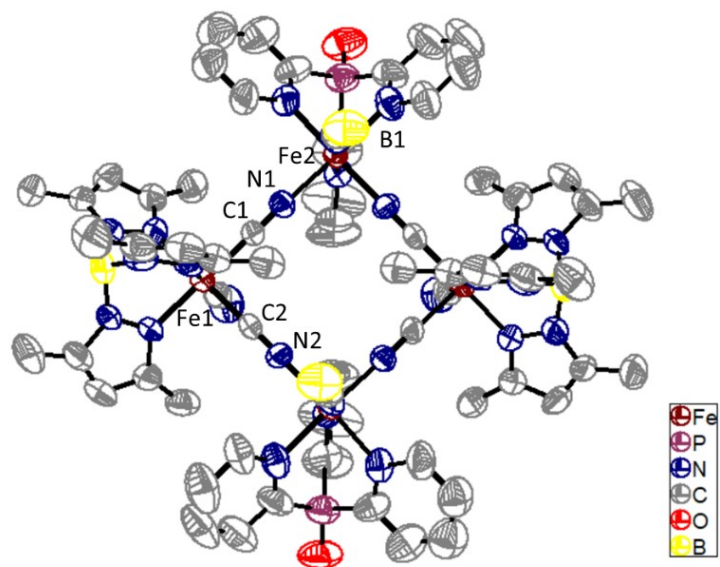

**Fig.S13** Crystal structure of **3** at 300 K drawn with ellipsoids at the 50% probability level. The hydrogen atoms have been omitted for the sake of clarity.

## Density Functional Theory Calculations

Investigation of the spin multiplicity of individual Fe sites in the  $\{\text{Fe}^{\text{III}}_2\text{Fe}^{\text{II}}_2\}$  compounds using the full molecular structure.

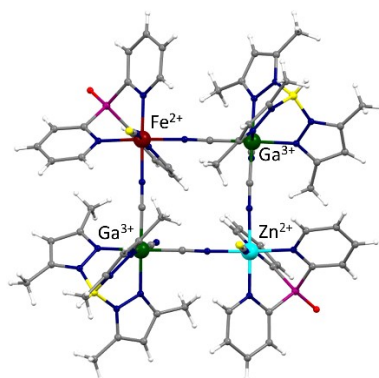

**Fig. S14** Example of the structure of the compounds investigated with one  $\text{Fe}^{2+}$  ion replaced by  $\text{Zn}^{2+}$  ion and two  $\text{Fe}^{3+}$  ions replaced by two  $\text{Ga}^{3+}$  ions

**Table S3.** Energy calculated from a single-point-calculation for each Fe site in each structure.

| Iron position | Spin Multiplicity | Energy ( $\text{cm}^{-1}$ ) |                   |                   |                   |                   |                   |
|---------------|-------------------|-----------------------------|-------------------|-------------------|-------------------|-------------------|-------------------|
|               |                   | 1 <sup>100K</sup>           | 1 <sup>300K</sup> | 2 <sup>100K</sup> | 2 <sup>300K</sup> | 3 <sup>100K</sup> | 3 <sup>300K</sup> |
| Fe1           | 2                 | 0.0                         | 0.0               | 0.0               | 0.0               | 0.0               | 0.0               |
|               | 4                 | 21864.3                     | 13397.8           | 18673.3           | 19837.2           | 14023.3           | 14039.4           |
|               | 6                 | 22190.7                     | 22160.0           | 22565.1           | 22604.1           | 22355.3           | 24216.6           |
| Fe1A          | 2                 | 0.0                         | 0.0               | 0.0               | 0.0               | 0.0               | 0.0               |
|               | 4                 | 21864.9                     | 13397.3           | 18673.7           | 19837.4           | 14023.1           | 14039.8           |
|               | 6                 | 22191.2                     | 22160.2           | 22565.1           | 22603.7           | 22355.4           | 24217.3           |
| Fe2           | 1                 | 0.0                         | 5645.9            | 0.0               | 4313.1            | 0.0               | 0.0               |
|               | 3                 | 9697.9                      | 6710.6            | 10201.4           | 6042.1            | 9998.2            | 5177.6            |
|               | 5                 | 11852.2                     | 0.0               | 13574.5           | 0.0               | 12661.8           | 1997.1            |
| Fe2A          | 1                 | 0.0                         | 5646.7            | 0.0               | 4330.6            | 0.0               | 0.0               |
|               | 3                 | 9698.2                      | 6710.6            | 10827.4           | 6059.2            | 10540.9           | 4880.2            |
|               | 5                 | 11852.6                     | 0.0               | 13574.3           | 0.0               | 12658.8           | 1992.4            |

**Table S4.** Interaction of  $\{\text{Fe}^{\text{III}}_2\text{Fe}^{\text{II}}_2\}$  compound at low temperature (100 K).

| Compound | $E_{\text{High-Spin}} - E_{\text{BrokenSym}}$ ( $\text{cm}^{-1}$ ) | $J(1)^{1-3}$ ( $\text{cm}^{-1}$ ) | $J(2)^4$ ( $\text{cm}^{-1}$ ) | $J(3)^{5,6}$ ( $\text{cm}^{-1}$ ) |
|----------|--------------------------------------------------------------------|-----------------------------------|-------------------------------|-----------------------------------|
| 1        | -0.736                                                             | 0.74                              | 0.37                          | 0.74                              |
| 2        | 2.010                                                              | -2.01                             | -1.00                         | -2.01                             |
| 3        | 0.920                                                              | -0.92                             | -0.46                         | -0.92                             |

The exchange parameters  $J(1)$  to  $J(3)$  are calculated in three different ways as following:

$$J(1) = \frac{-(E_{HS} - E_{BS})}{S_{max}^2}; \quad J(2) = \frac{-(E_{HS} - E_{BS})}{S_{max} \times (S_{max} + 1)}; \quad J(3) = \frac{-(E_{HS} - E_{BS})}{\langle S^2 \rangle_{HS} - \langle S^2 \rangle_{BS}}.$$

**Reference:**

- (1) A. P. Ginsberg, *J. Am. Chem. Soc.*, 1980, **102**, 111–117.
- (2) L. Noodleman, *J. Chem. Phys.*, 1981, **74**, 5737–5743.
- (3) L. Noodleman and E.-R. Davidson, *J. Chem. Phys.*, 1985, **109**, 131–143.
- (4) A. Bencini and D. Gatteschi, *J. Am. Chem. Soc.*, 1980, **108**, 5763–5771.
- (5) Yamaguchi, K.; Takahara, Y.; Fueno T.; *Applied Quantum Chemistry*. V.H. Smith (Ed.) Reidel, Dordrecht, 1986.
- (6) T. Soda, Y. Kitagawa, T. Onishi, Y. Takano, Y. Shigeta, H. Nagao, Y. Yoshioka and K. Yamaguchi, *Chem. Phys. Lett.*, 2000, **319**, 223–230.
